# Supplementary material for: The Characterization of Immunoprotection Induced by a cDNA Clone Derived from the Attenuated Taiwan Porcine Epidemic Diarrhea Virus Pintung 52 Strain
Source: PubMed Central journal article supplement (PMC6213177; doi:10.3390/v10100543), 2018-10-04
Supplement: viruses-10-00543-s001.pdf [file viruses-10-00543-s001.pdf]

## Supplementary material and method

### Bioinformatic analysis

Raw reads with good quality were aligned against host genome (UCSC chlSab2) using BWA-MEM v.0.7.17 with default settings, followed by non-host reads extraction. De novo assembly of those short non-host reads was accomplished using A5-miseq version 20160825 genome assembler software that produced several contigs. Longest contig with highest similarity against reference sequence from NCBI (GenBank: KY929406.1) were chosen for downstream analysis. The sequence similarity between reference sequence and assembled contig was calculated by the Needleman-Wunsch algorithm provided by EMBL-EBI website ([https://www.ebi.ac.uk/Tools/psa/emboss\\_needle/nucleotide.html](https://www.ebi.ac.uk/Tools/psa/emboss_needle/nucleotide.html)). Realignment of non-host reads were performed with BWA-MEM v.0.7.17 to virus reference sequence from NCBI (GenBank: KY929406.1). Reads subtraction and file conversion were carried out by the SAMtools v.1.9 and BEDTools v.2.27.1 software. Variants (SNPs/Indels) were determined by the VarScan v.2.4.3 software with the parameter setting: --min-coverage 20 --min-var-freq 0.2 --min-reads 4 --min-avg-qual 20 --p-value 0.05 for individual mode and --min-coverage 20 --min-var-freq 0.2 --min-reads 10 --min-avg-qual 20 --p-value 0.05 for paired mode.

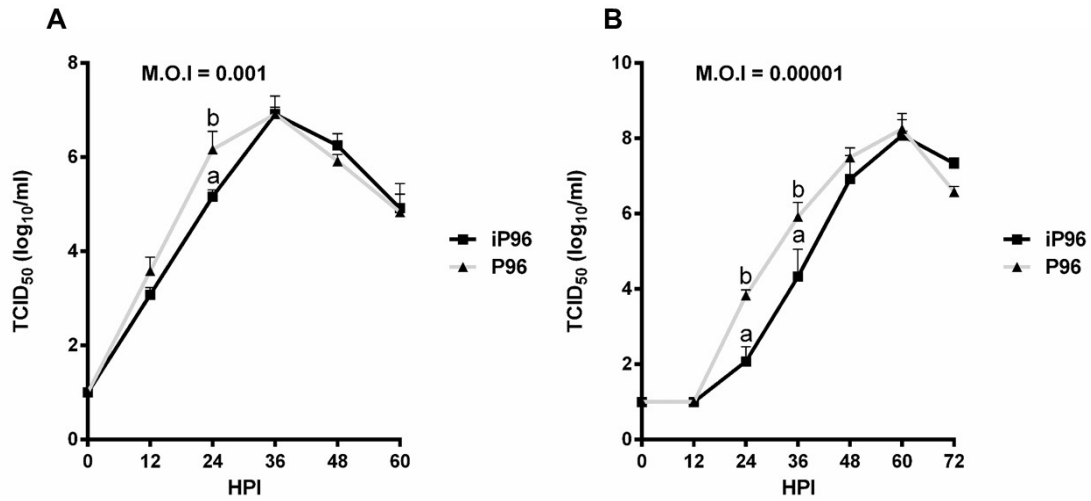

Figure S1. Growth kinetics of iPEDVPT-P96 and PEDVPT-P96 viruses in Vero cells after infection at 0.001 and 0.00001 MOI. The titers of each virus at the indicated time points (hours post-infection; HPI) were expressed as mean  $\pm$  standard deviation. Different alphabetic letters indicate significant differences between the iPEDVPT-P96 or PEDVPT-P96 groups ( $p < 0.05$ ).

**Table S1. Variants of iPEDVPT-P96 and PEDVPT-P96 recovered from next generation sequencing**

| Position           | Gene  | Reference Base | Variant Base   | Reference Amino Acid | Variant Amino Acid | Coverage Depth | Variant Reads | Variant frequency* |
|--------------------|-------|----------------|----------------|----------------------|--------------------|----------------|---------------|--------------------|
| <b>PEDVPT-P96</b>  |       |                |                |                      |                    |                |               |                    |
| 46                 | 5'UTR | A              | G              | --                   | --                 | 4290           | 892           | 20.81%             |
| 644                | NSP2  | T              | Y              | Y                    | Y/H                | 2122           | 1669          | 78.4 %             |
| 1099               | NSP2  | T              | G/K            | N                    | N/K                | 2805           | 731           | 26.07%             |
| 1281               | NSP2  | C              | T/Y            | S                    | S/F                | 2450           | 684           | 27.93%             |
| 2151               | NSP2  | T              | C              | I                    | I/N                | 1770           | 1716          | 98.06%             |
| 3172               | NSP3  | C              | T              | D                    | D                  | 3808           | 3188          | 84.38%             |
| 4983               | NSP3  | C              | T              | S                    | F                  | 877            | 877           | 100%               |
| 10384              | NSP6  | G              | T/K            | Q                    | Q/H                | 3497           | 1322          | 37.81%             |
| 11950              | NSP9  | T              | C/Y            | Y                    | Y                  | 4207           | 2737          | 65.06%             |
| 13597              | NSP12 | G              | T/K            | V                    | V/L                | 6133           | 3117          | 50.95%             |
| 14931              | NSP12 | T              | G/K            | V                    | V                  | 4383           | 1629          | 37.17%             |
| 17064              | NSP14 | A              | T/W            | V                    | V                  | 2691           | 935           | 34.78%             |
| 19470              | NSP15 | T              | G/K            | I                    | I/M                | 3160           | 1651          | 59.15%             |
| 21029              | S     | A              | T/W            | K                    | K/N                | 4191           | 1556          | 37.13%             |
| 21064              | S     | T              | C/Y            | I                    | I/T                | 3644           | 1391          | 38.17%             |
| 21931              | S     | A              | G/R            | D                    | D/G                | 3265           | 1268          | 38.85%             |
| 22288              | S     | C              | T/Y            | S                    | S/L                | 5697           | 1150          | 20.19%             |
| 22540              | S     | A              | R              | E                    | E/G                | 6895           | 5727          | 83.06 %            |
| 23535              | S     | G              | T/K            | A                    | A/S                | 3134           | 1049          | 33.49%             |
| 23695              | S     | G              | T              | S                    | I                  | 7506           | 5949          | 79.68%             |
| 24767              | S     | A              | T/W            | E                    | E/D                | 3009           | 605           | 20.11%             |
| 25517              | E     | T              | C/Y            | F                    | F                  | 3321           | 2542          | 76.77%             |
| 27903              | 3'UTR | C              | A/M            | --                   | --                 | 4019           | 912           | 22.71%             |
| <b>iPEDVPT-P96</b> |       |                |                |                      |                    |                |               |                    |
| 1099               | NSP2  | T              | G <sup>a</sup> | N                    | K                  | 1823           | 1823          | 100%               |
| 2151               | NSP2  | T              | C <sup>a</sup> | I                    | N                  | 917            | 906           | 100%               |
| 3172               | NSP3  | C              | T <sup>a</sup> | D                    | D                  | 1796           | 1781          | 99.94%             |
| 7019               | NSP3  | T              | C              | C                    | R                  | 1675           | 1652          | 99.82%             |
| 16305              | NSP13 | T              | G/K            | S                    | S                  | 1140           | 545           | 47.85%             |
| 24341              | S     | C              | T <sup>§</sup> | D                    | D                  | 3197           | 3173          | 99.94%             |
| 24767              | S     | A              | T <sup>a</sup> | E                    | D                  | 1367           | 1366          | 100%               |
| 24841              | ORF3  | T              | C <sup>§</sup> | F                    | F                  | 1061           | 1037          | 100%               |
| 25517              | E     | T              | C <sup>a</sup> | F                    | F                  | 1943           | 1912          | 100%               |
| 27874              | 3'UTR | A              | G              | --                   | --                 | 4057           | 3980          | 99.92%             |

\* The frequency was referred to the first nucleotide before the slash in column "Variant Base"

§ Introduced marker mutation

<sup>a</sup>Single nucleotide variant also found in PEDVPT-P96
